# Supplementary material
Source: publisher figshare collection journal article supplement (https://frontiersin.figshare.com/ndownloader/files/35270632)
Supplement: Supplementary file [file 35270632]

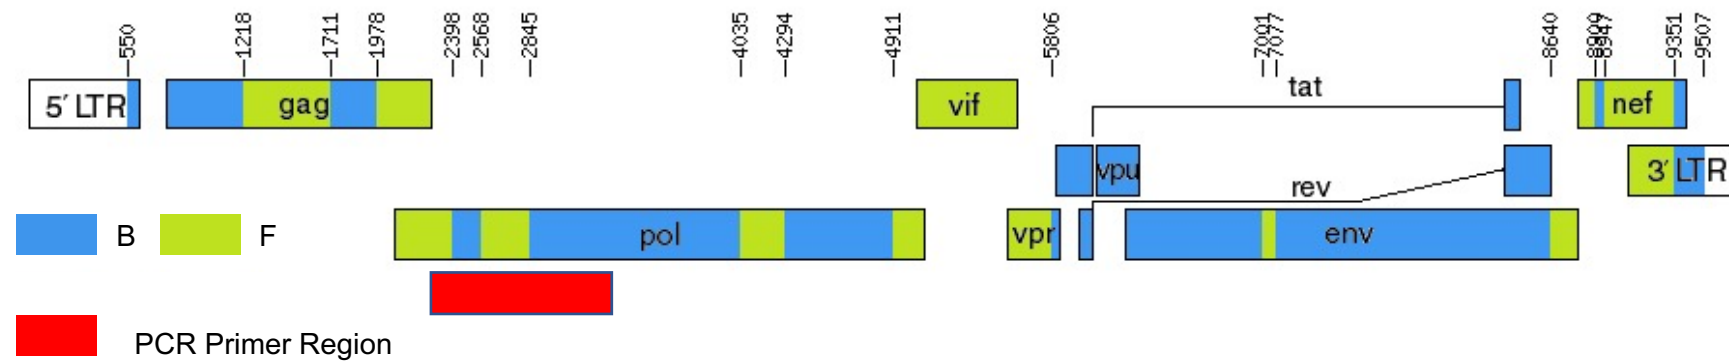

**Supplementary Figure 1.** Mosaic genomic structure of CRF47\_BF (from Los Alamos National Lab HIV Database) with targeted primers for the PR\_RT amplicon annotated (shown in red) on the pol gene.
